# Supplementary material
Source: publisher figshare collection journal article supplement (https://tandf.figshare.com/ndownloader/files/6487371)
Supplement: Supplementary file 1 [file 6487371]

**Double-armed and tetra-armed cyclen-based cryptands**

Mari Ikeda,*a* Ajay Kumar Sah,*b* Rina Murashige,*c* Miki Iwase,c Shunsuke Kuwahara*c,d* and Yoichi Habata**c,d*

*a Education Centre, Faculty of Engineering, Chiba Institute of Technology, 2-1-1 Shibazono, Narashino, Chiba 275-0023, Japan*

*b Department of Chemistry, Birla Institute of Technology and Science, Pilani-333031, Rajasthan, India*

*c Department of Chemistry, Faculty of Science, Toho Unviersity, 2-2-1 Miyama, Funabashi, Chiba 274-8510; E-mail: habata@chem.sci.toho-u.ac.jp*

*d Research Centre for Materials with Integrated Properties, Toho University, 2-2-1 Miyama, Funabashi, Chiba 274-8510, Japan Fax: +81 47 472 4322*

**Table of Contents**

**Fig. S1.** 1H NMR of **1a** in CD2Cl2. 2

**Fig. S2.**  1H NMR of **1b** in CD2Cl2. 2

**Fig. S3.**  1H NMR of **1d** in CD2Cl2. 3

**Fig. S4.** 1H NMR of **2** in CD2Cl2 3

**Fig. S5.**  1H NMR of **1a-pre** in CD2Cl2. 4

**Fig. S6.**  1H NMR of **1b-pre** in CD2Cl2. 4

**Fig. S7.**  1H NMR of **1d-pre** in CD2Cl2. 5

**Fig. S8.**  1H NMR of **3a** in CD2Cl2. 5

**Fig. S9.**  1H NMR of **3b** in CD2Cl2. 6

**Fig. S10.**  1H NMR of **3a-pre** in D2O in the presence of NaOD. 6

**Fig. S11.**  1H NMR of **3b-pre** in D2O in the presence of NaOD. 7

**Fig. S12.**  Ag+-ion-induced UV spectral changes of **1a**. 8

**Fig. S13.**  Ag+-ion-induced UV spectral changes of **1b**. 8

**Fig. S14.**  Ag+-ion-induced UV spectral changes of **1d**. 8

**Fig. S15.**  Ag+-ion-induced UV spectral changes of **2**. 8

**Fig. S16.** UV titration curve of Ag+/**1a** system at 287.5 nm. 8

**Fig. S17.** UV titration curve of Ag+/**1b** system at 290 nm. 8

**Fig. S18.** UV titration curve of Ag+/**1c** system at 285 nm. 9

**Fig. S19.** UV titration curve of Ag+/**1d** system at 259 nm. 9

**Fig. S20.** UV titration curve of Ag+/**2** system at 288.5 nm. 9

**Fig. S21.** UV titration curve of Ag+/**3a** system at 288.5 nm. 9

**Fig. S22.** UV titration curve of Ag+/**3b** system at 262 nm. 10

**Fig. S23.** UV titration curve of Ag+/**3c** system at 263 nm. 10

**Fig. S24.** UV titration curve of Ag+/**4** system at 259.5 nm. 10

**Fig. S25.** Ag+-ion-induced-1H NMR spectral changes of **1a**. 11

**Fig. S26.** Ag+-ion-induced-1H NMR spectral changes of **1b**. 11

**Fig. S27.** Ag+-ion-induced-1H NMR spectral changes of **1d**. 12

**Fig. S28.** Ag+-ion-induced-1H NMR spectral changes of **3a**. 12

**Fig. S29.** Ag+-ion-induced-1H NMR spectral changes of **3b**. 13

**Fig. S30.** HOMOs and LUMOs of **1a**, **1b**, and **1d**. 13


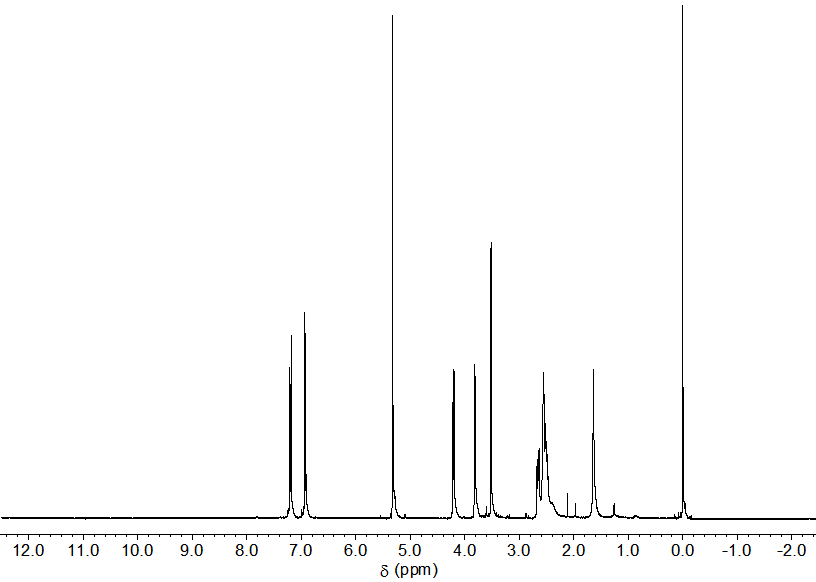


**Fig. S1.**  1H NMR of **1a** in CD2Cl2.


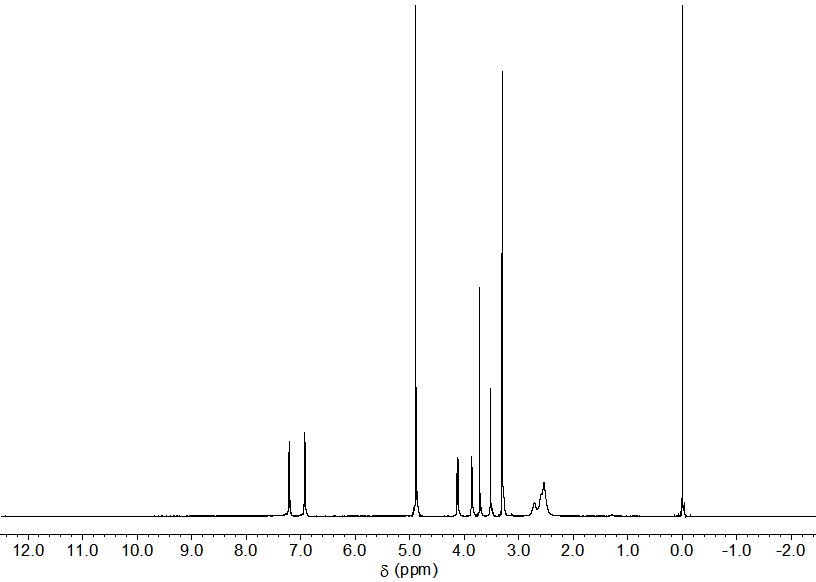


**Fig. S2.** 1H NMR of **1b** in CD2Cl2.


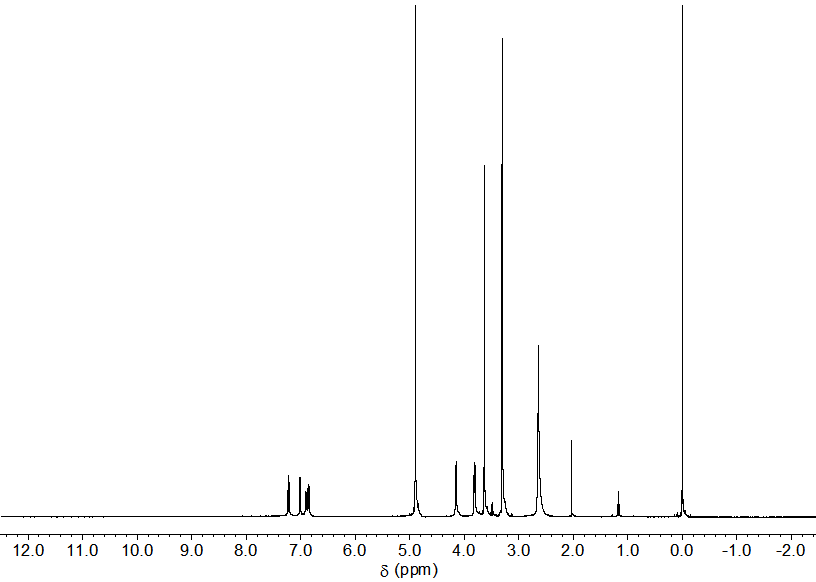


**Fig. S3.** 1H NMR of **1d** in CD2Cl2.


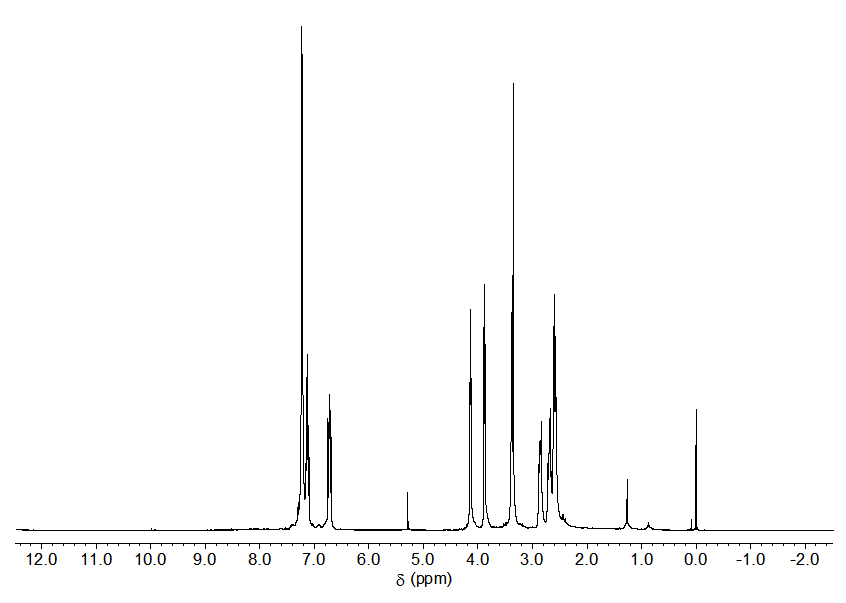


**Fig. S4.**  1H NMR of **2** in CD2Cl2.


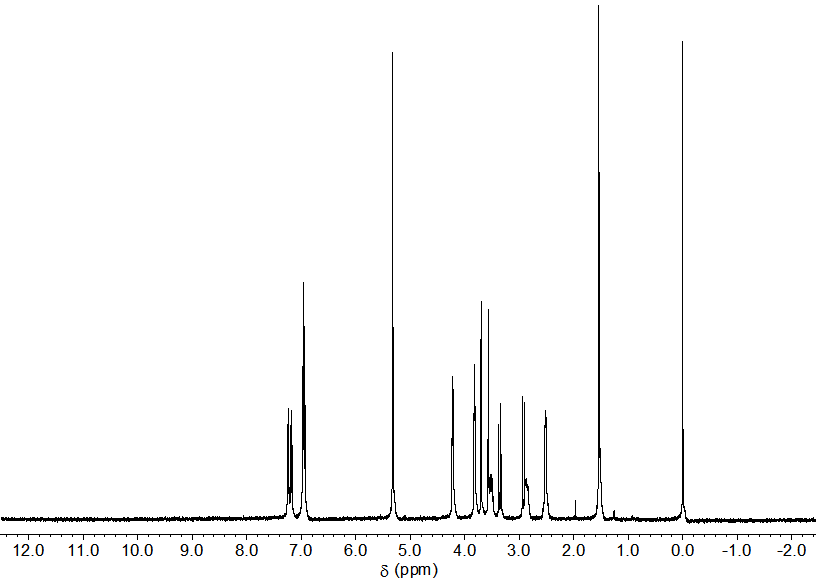


**Fig. S5.**  1H NMR of **1a-pre** in CD2Cl2.


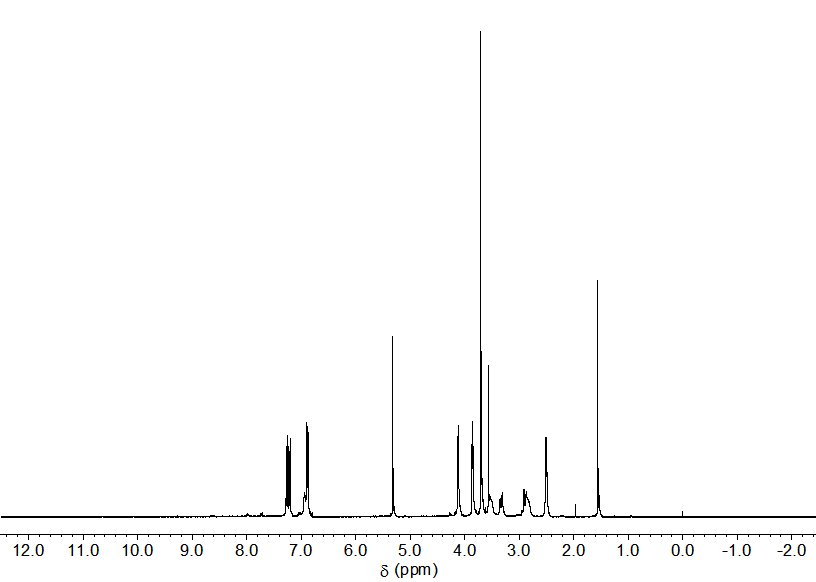


**Fig. S6.** 1H NMR of **1b-pre** in CD2Cl2.


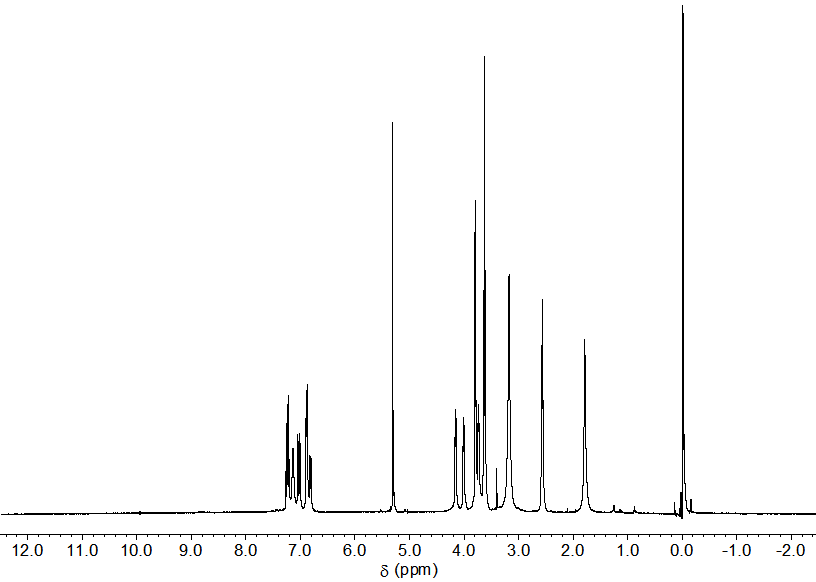


**Fig. S7.**  1H NMR of **1d-pre** in CD2Cl2.


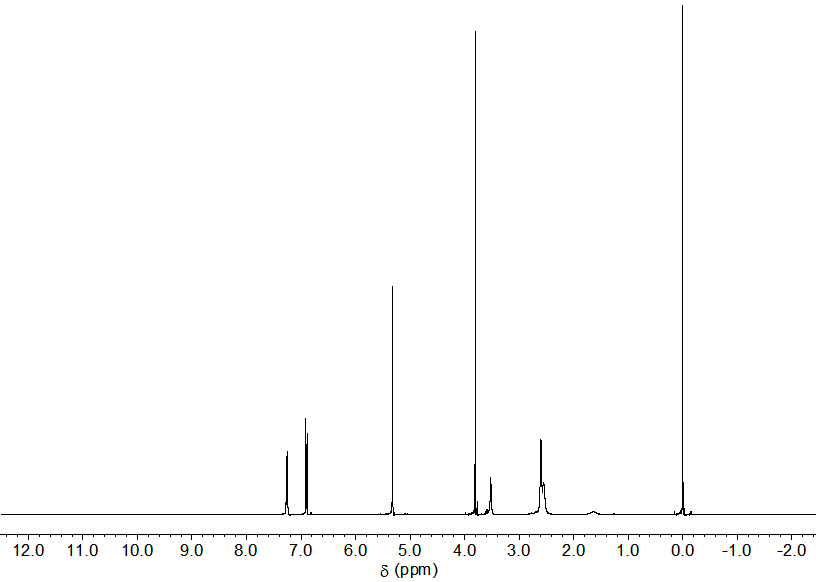


**Fig. S8.**  1H NMR of **3a** in CD2Cl2.


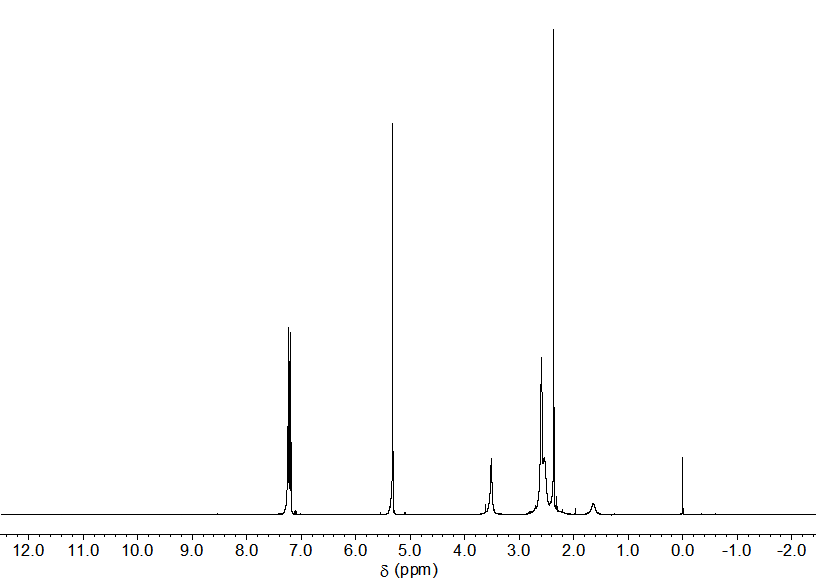


**Fig. S9.**  1H NMR of **3b** in CD2Cl2.


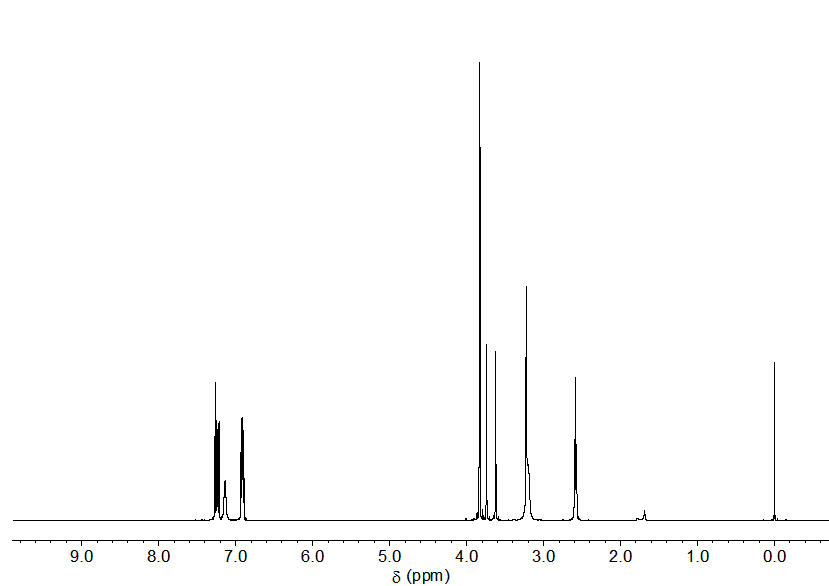


**Fig. S10.**  1H NMR of **3a-pre** in D2O in the presence of NaOD.


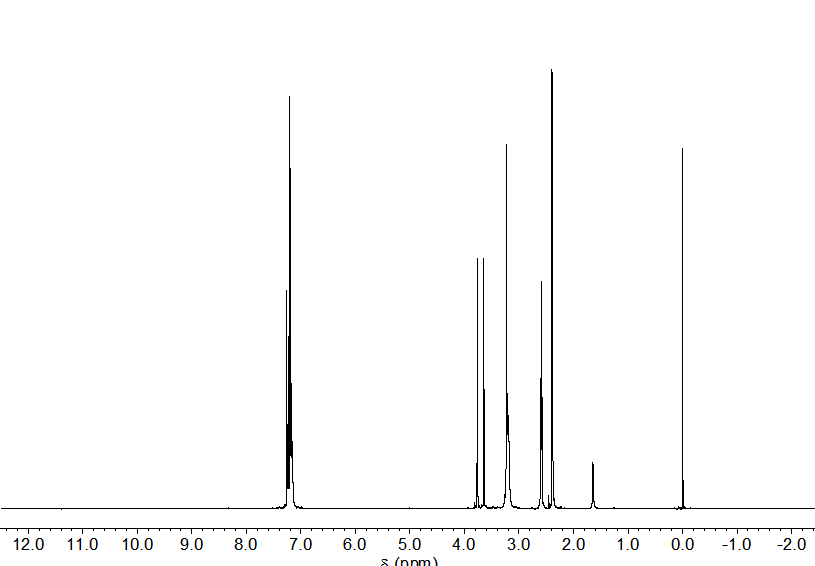


**Fig. S11.** 1H NMR of **3b-pre** in D2O in the presence of NaOD.


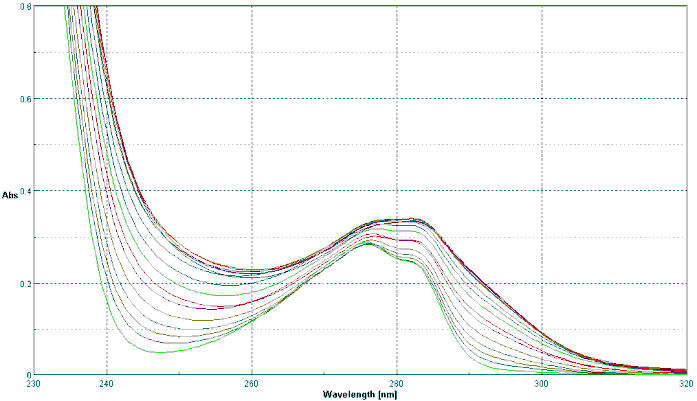

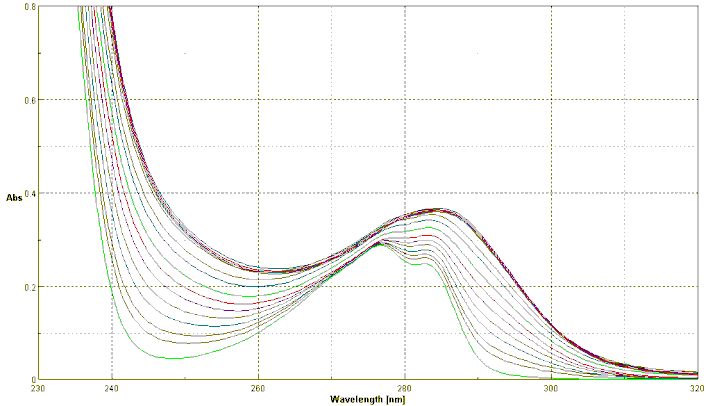


**Fig. S12.** Ag+-ion-induced UV spectral changes of **1a**. **Fig. S13.** Ag+-ion-induced UV spectral changes of **1b**.


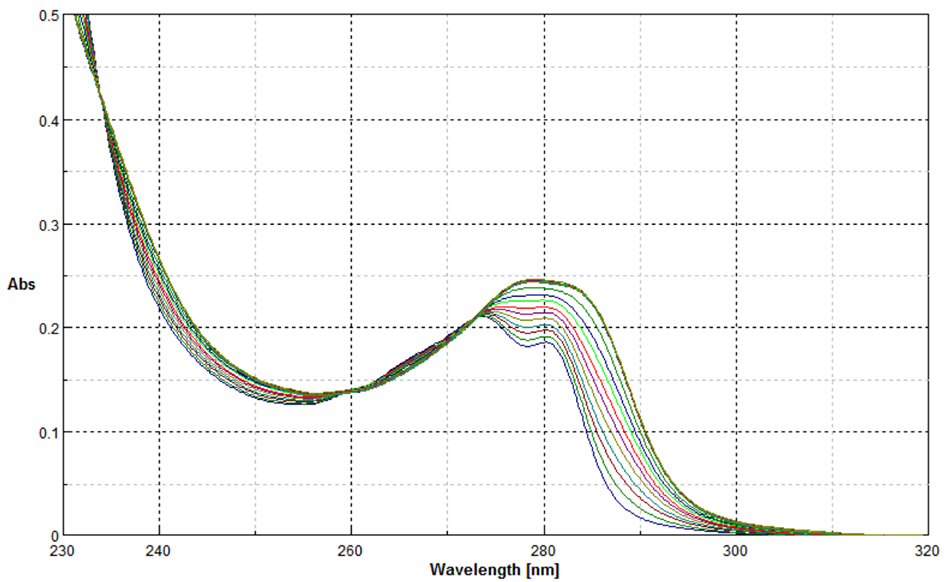


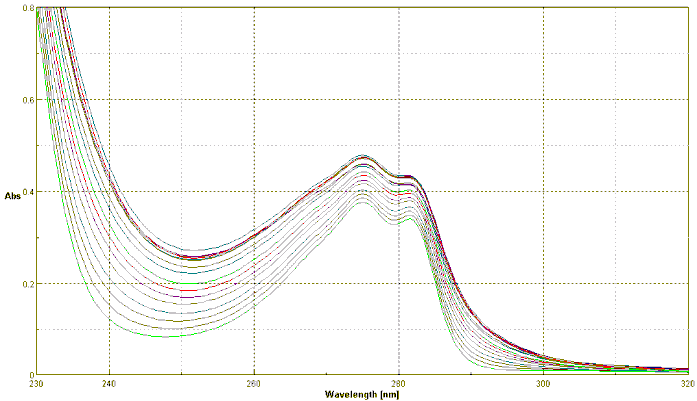


**Fig. S14.** Ag+-ion-induced UV spectral changes of **1d**. **Fig. S15.** Ag+-ion-induced UV spectral changes of **2**.

**
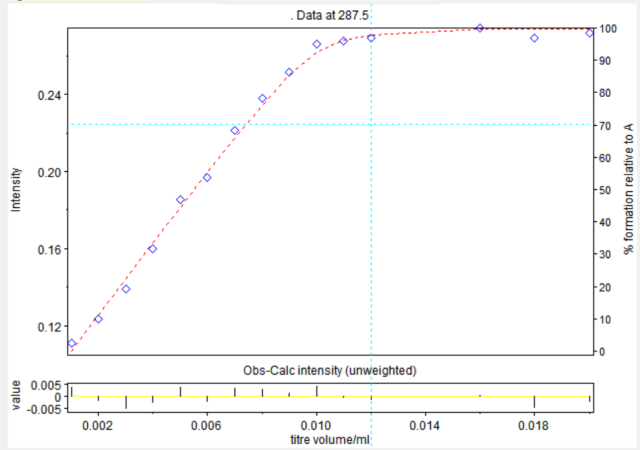
**

Converged in 1 iterations with sigma = 3.4080E-03

standard

Log beta value deviation

AB 6.1089 0.0121

**Fig. S16.** UV titration curve of **1a**/Ag+ system at 287.5 nm. **♢**: Observed. ----: Calculated.


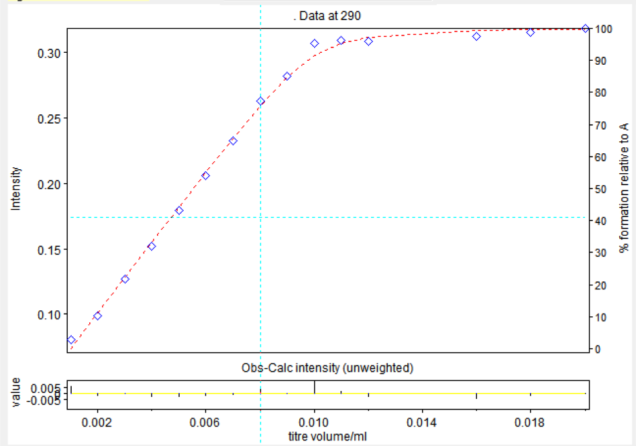


Converged in 1 iterations with sigma = 2.9043E-03

standard

Log beta value deviation

AB 6.085 0.0101

**Fig. S17.** UV titration curve of **1b**/Ag+system at 290 nm. **♢**: Observed. ----: Calculated.


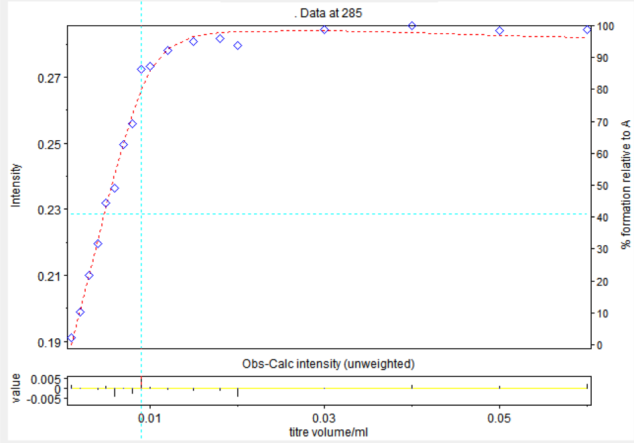


Converged in 1 iterations with sigma = 3.8735E-03

standard

Log beta value deviation

AB 5.6671 0.0324

**Fig. S18.** UV titration curve of **1c**/Ag+system at 285 nm. **♢**: Observed. ----: Calculated.


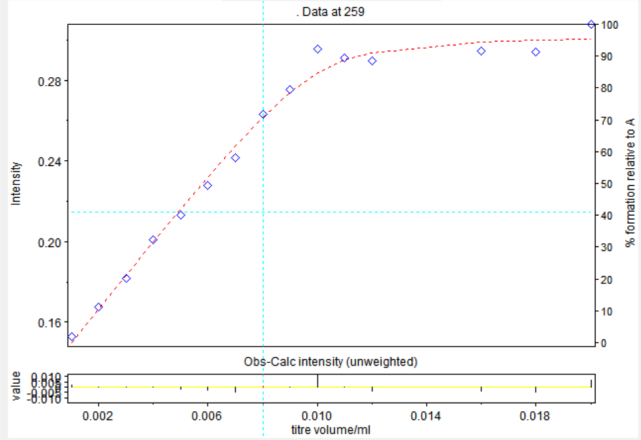


Converged in 1 iterations with sigma = 2.6978E-03

standard

Log beta value deviation

AB 5.8053 0.0093

**Fig. S19.** UV titration curve of **1d**/Ag+system at 259 nm. **♢**: Observed. ----: Calculated.


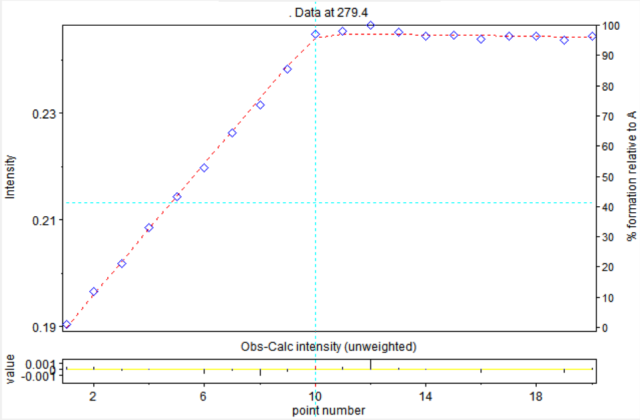


Converged in 1 iterations with sigma = 1.3159E-03

standard

Log beta value deviation

AB 7.9219 0.0313

**Fig. S20.** UV titration curve of **2**/Ag+system at 279.4 nm. **♢**: Observed. ----: Calculated.

**
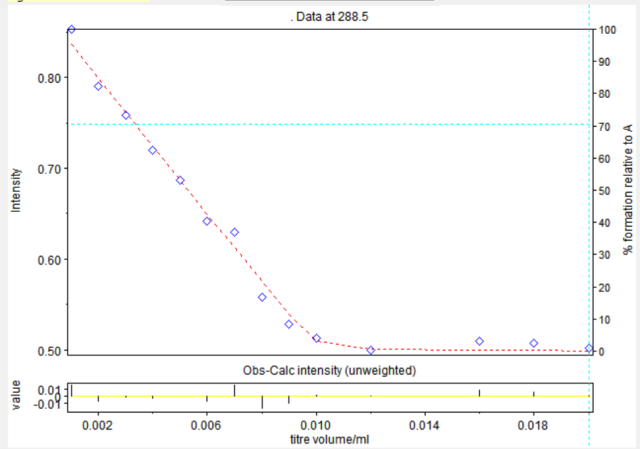
**

Converged in 1 iterations with sigma = 3.1942E-03

standard

Log beta value deviation

AB 7.1555 0.0721

**Fig. S21.** UV titration curve of **3a**/Ag+system at 288.5 nm. **♢**: Observed. ----: Calculated.


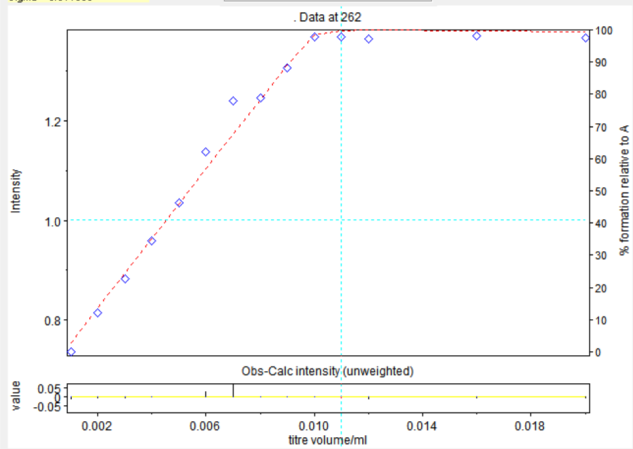


Converged in 1 iterations with sigma = 6.8238E-03

standard

Log beta value deviation

AB 7.6289 0.0606

**Fig. S22.** UV titration curve of **3b**/Ag+system at 262 nm. **♢**: Observed. ----: Calculated.


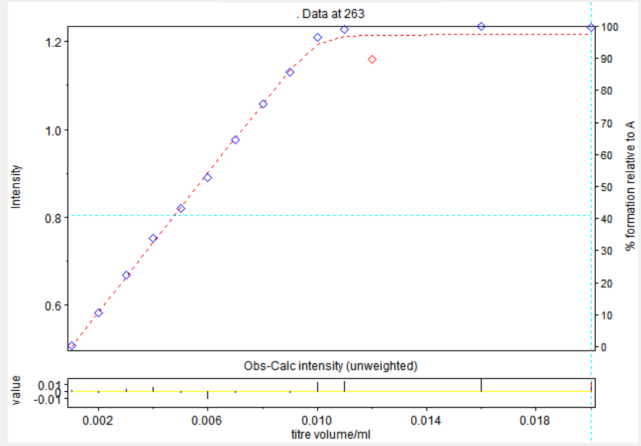


Converged in 1 iterations with sigma = 3.8410E-03

standard

Log beta value deviation

AB 7.1124 0.0298

**Fig. S23.** UV titration curve of **3c**/Ag+system at 263 nm. **♢**: Observed. ----: Calculated.


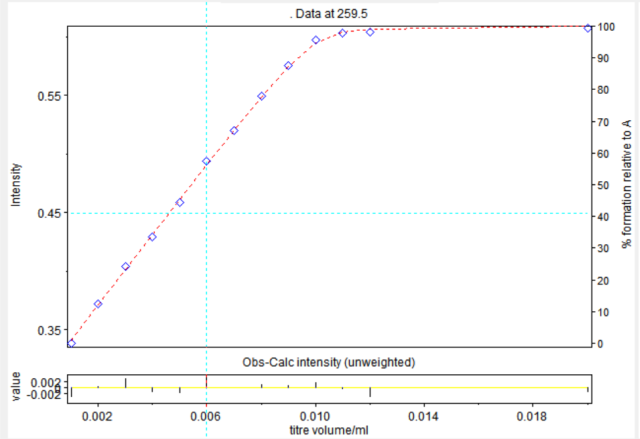


Converged in 1 iterations with sigma =2.4159E-03

standard

Log beta value deviation

AB 6.451 0.0227

**Fig. S24.** UV titration curve of **4**/Ag+system at 259.5 nm. **♢**: Observed. ----: Calculated.


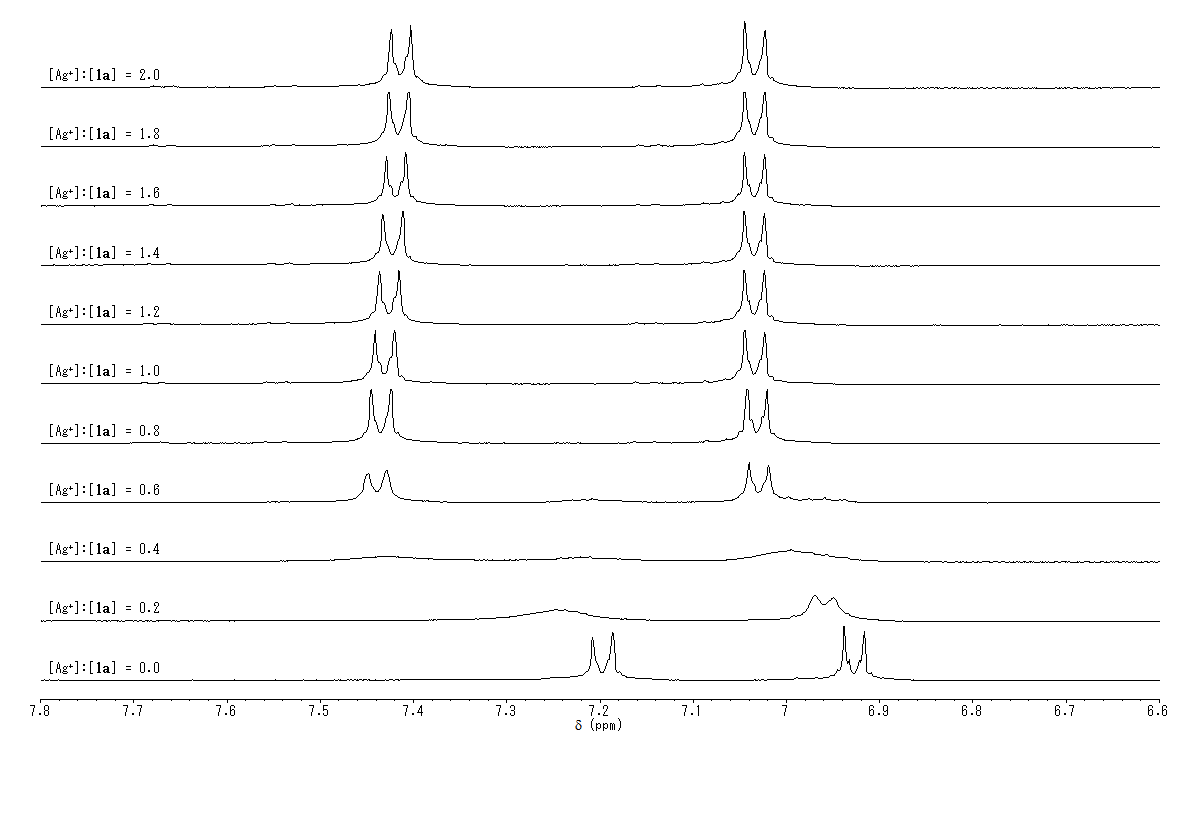


**Fig. S25**. Ag+-ion-induced-1H NMR spectral changes (aromatic regin) of **1a**.


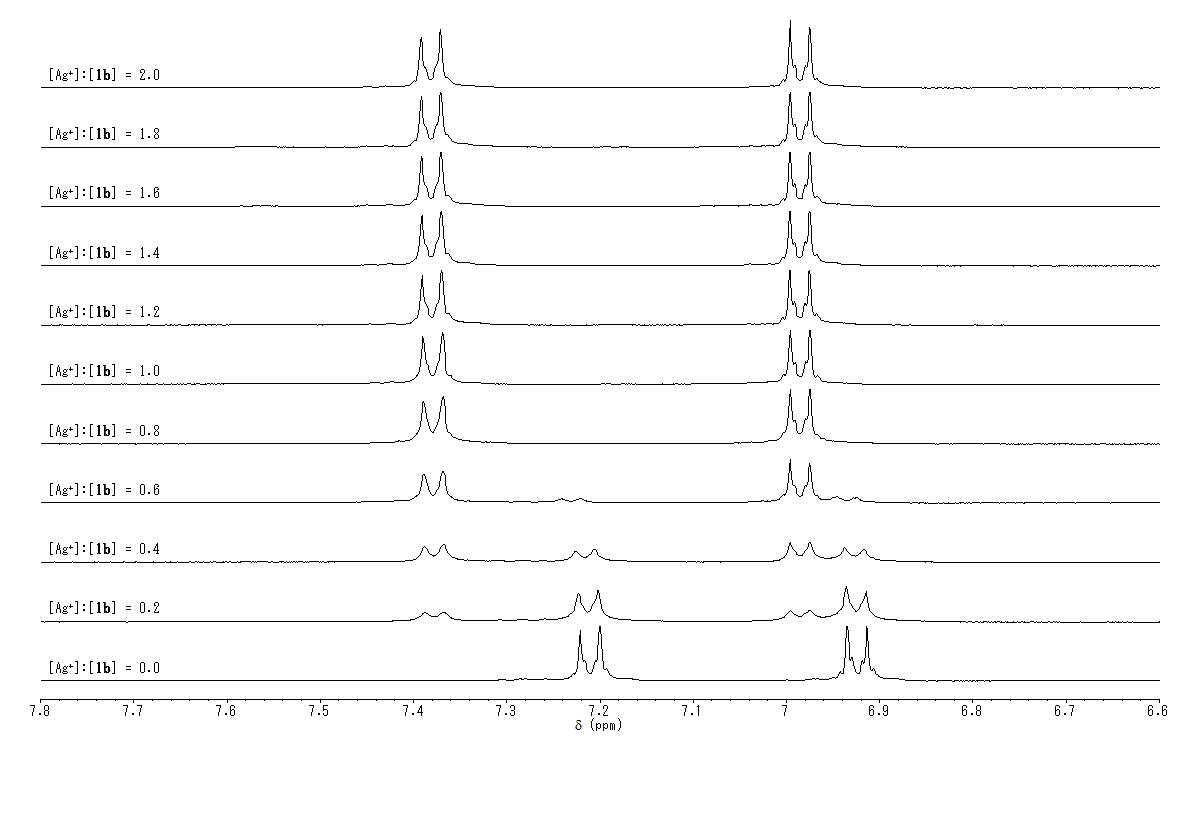


**Fig. S26**. Ag+-ion-induced-1H NMR spectral changes (aromatic regin) of **1b**.


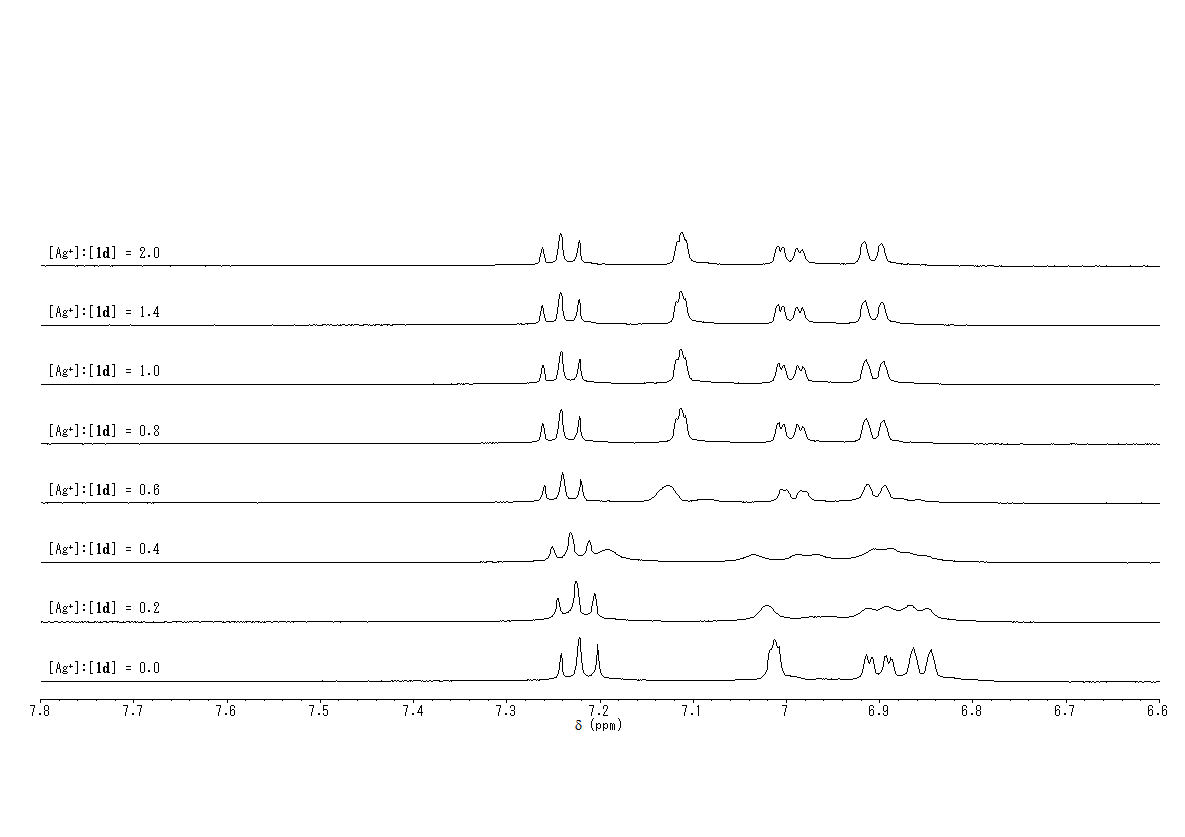


**Fig. S27**. Ag+-ion-induced-1H NMR spectral changes (aromatic regin) of **1d**.


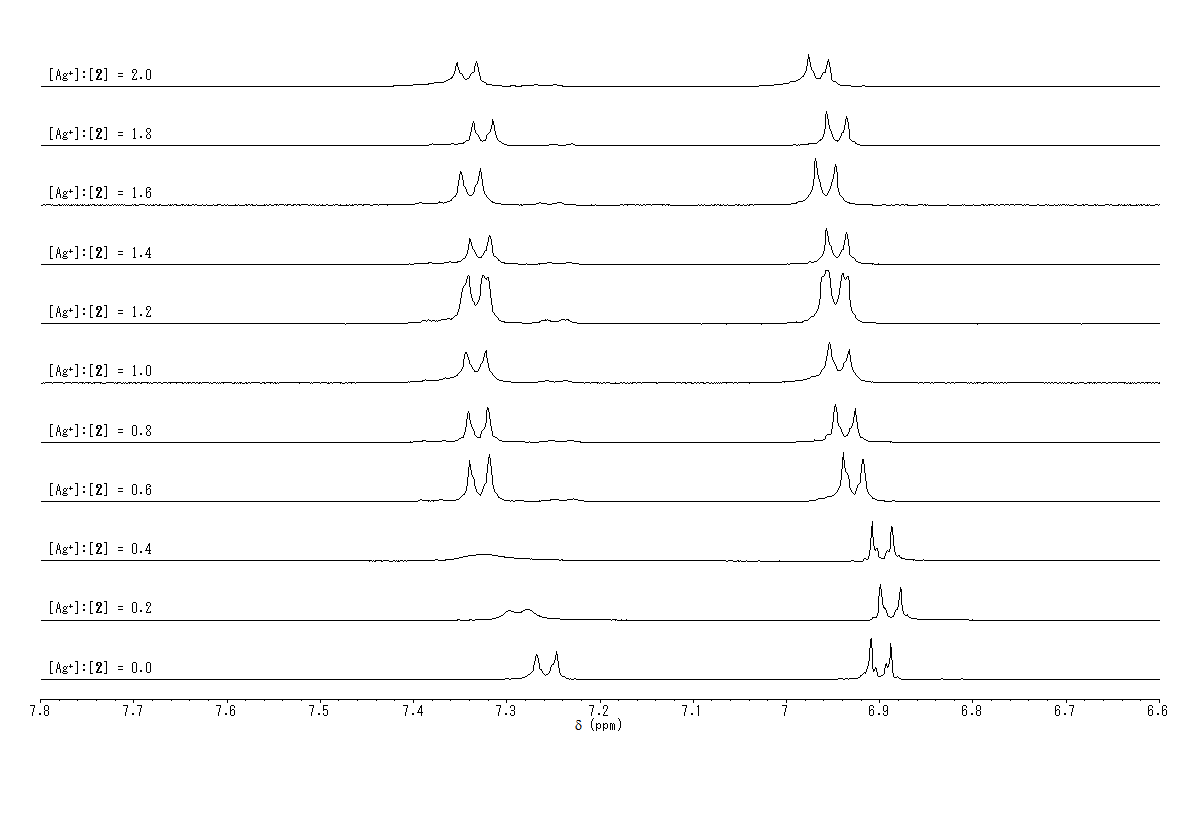


**Fig. S28**. Ag+-ion-induced-1H NMR spectral changes (aromatic regin) of **3a**.


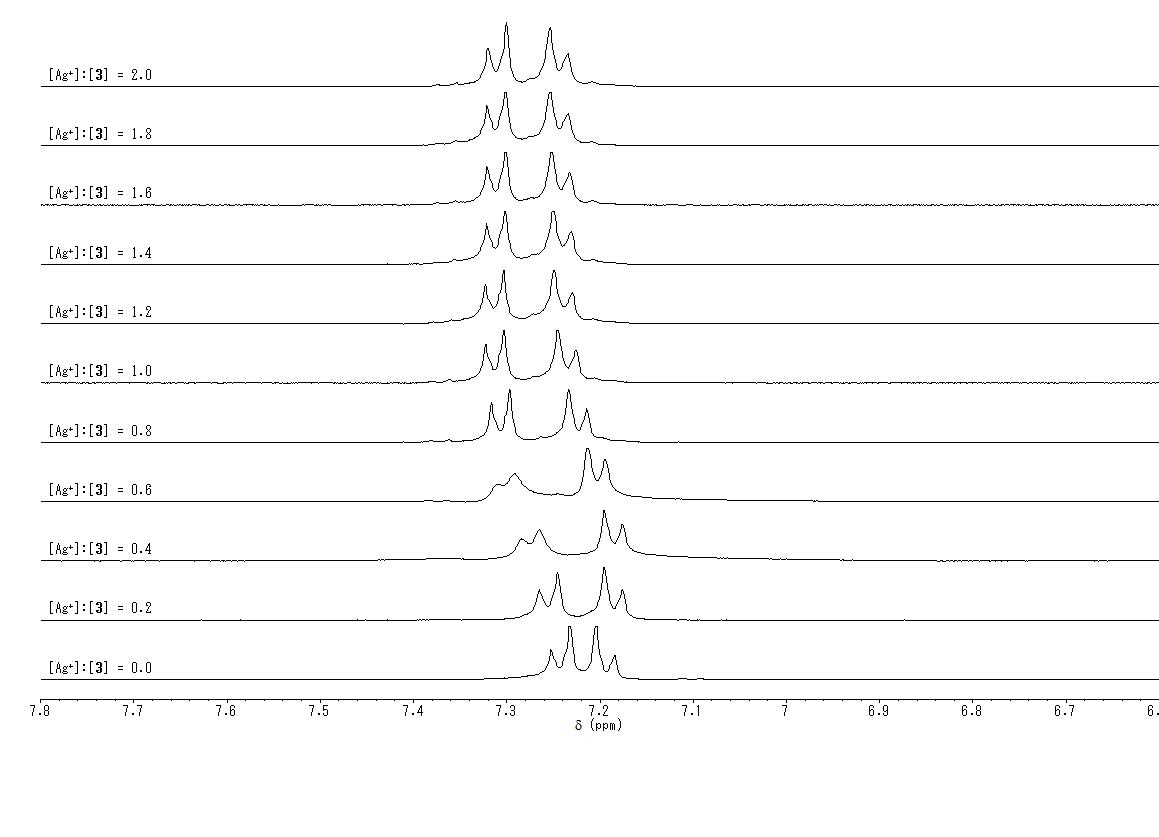


**Fig. S29**. Ag+-ion-induced-1H NMR spectral changes (aromatic regin) of **3b**.


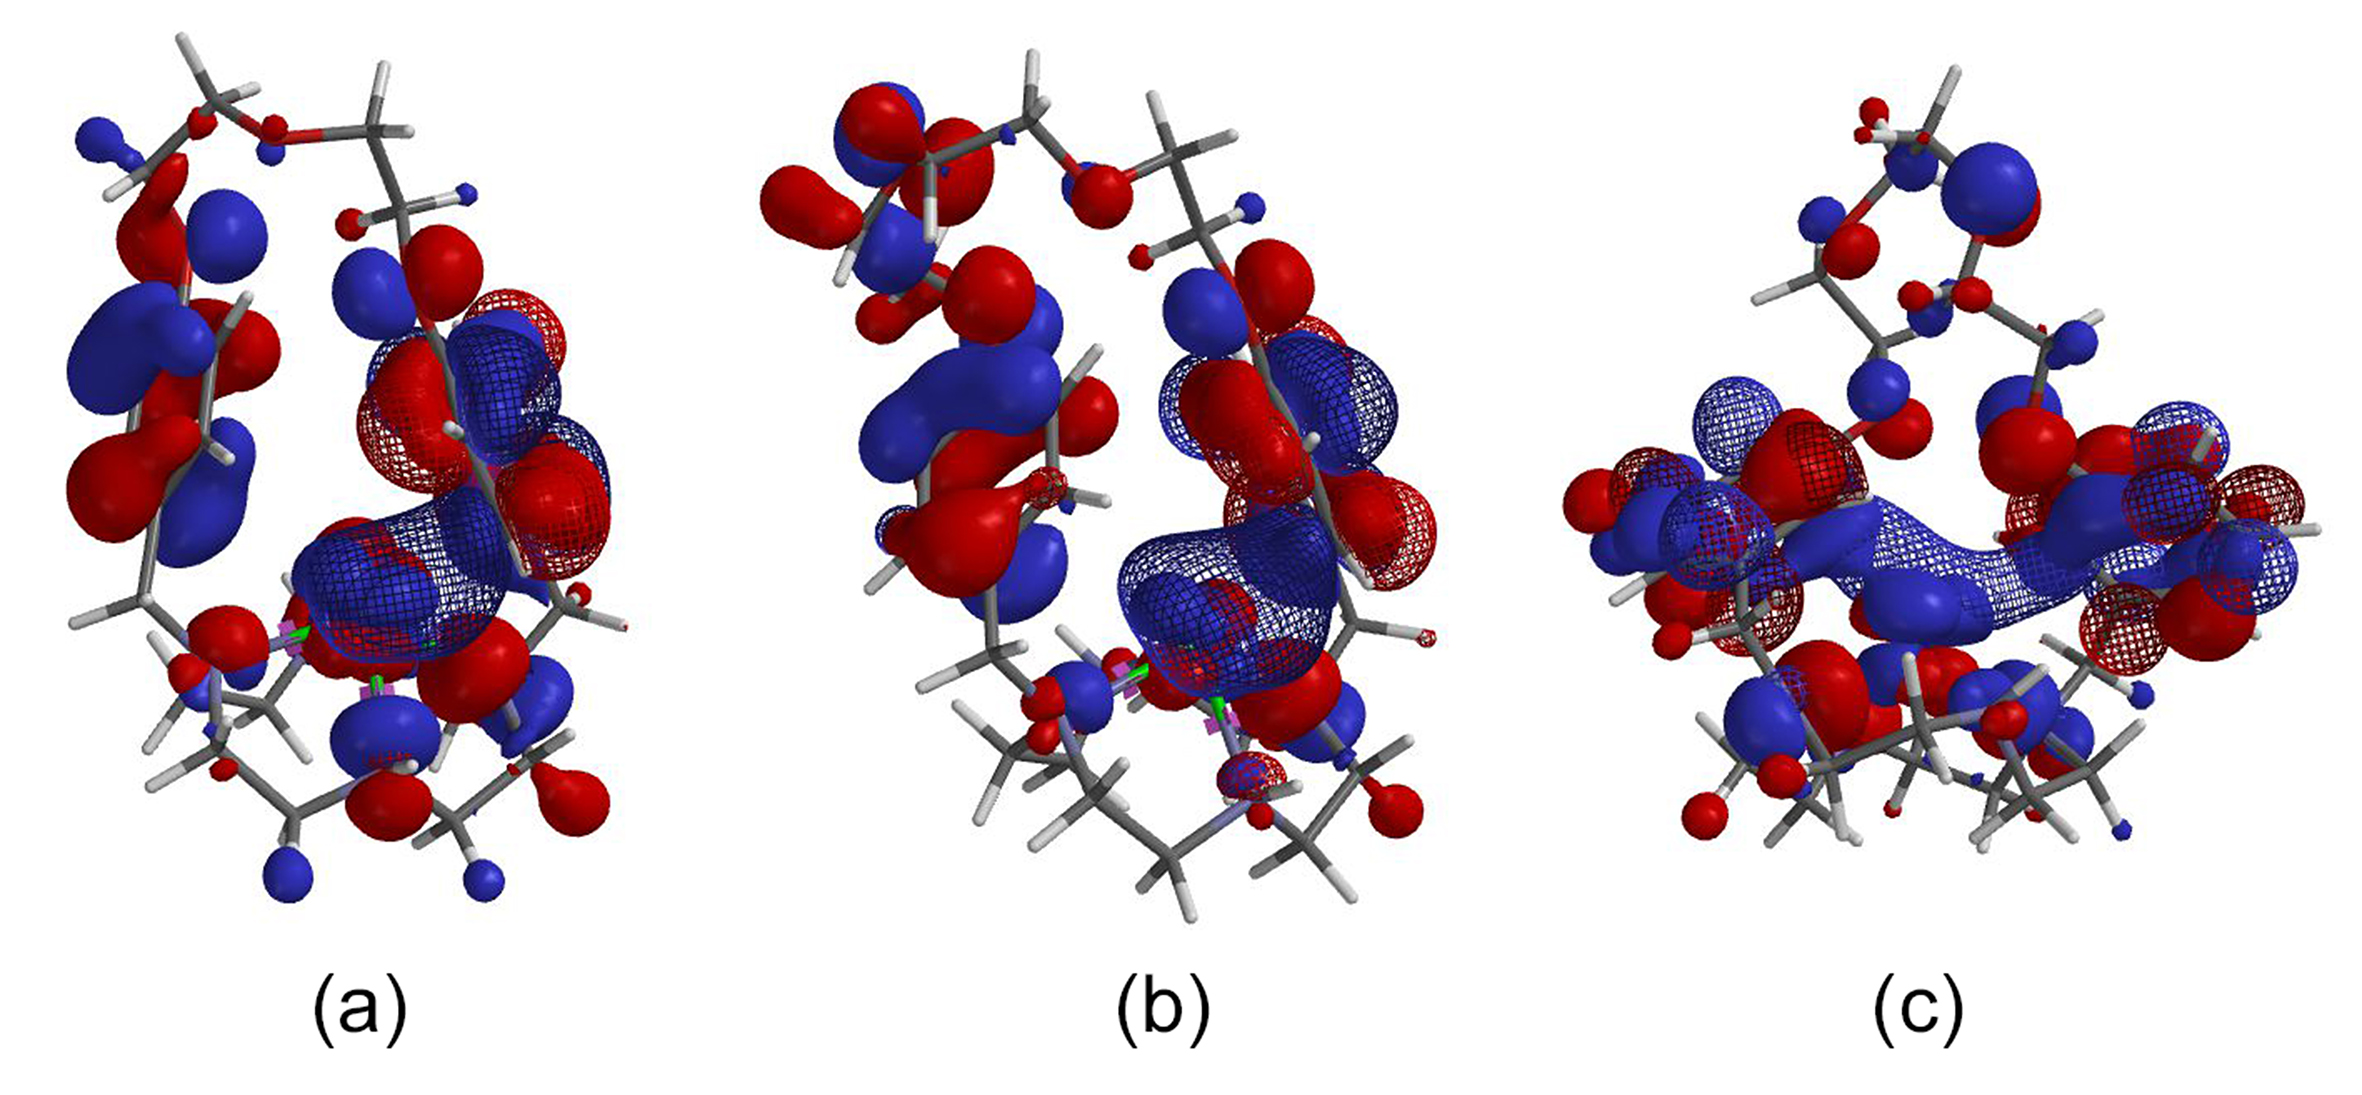


**Fig. S30**. LUMO (mesh) and HOMOs (solid) of **1a**/Ag+, **1b**/Ag+, and **1d**/Ag+ complexes. These structures were optimized using the DFT (the B3LYP/3-21G*). (a) LUMO, HOMO[–1], and HOMO[–2] of **1a**/Ag+, (b) LUMO, HOMO[–1], and HOMO[–2] of **1b**/Ag+, and (c) LUMO, HOMO[–1], and HOMO[–4] of **1d**/Ag+.
